# Supplementary material for: Fabrication of a room-temperature NO2 gas sensor with high performance at the ppb level using an rGO/BiOCl heterostructure
Source: Royal Society of Chemistry journal article supplement (doi:10.1039/d4ma00168k), 2024-01-01
Supplement: d4ma00168k1.pdf [file d4ma00168k1.pdf]

## Supplementary data

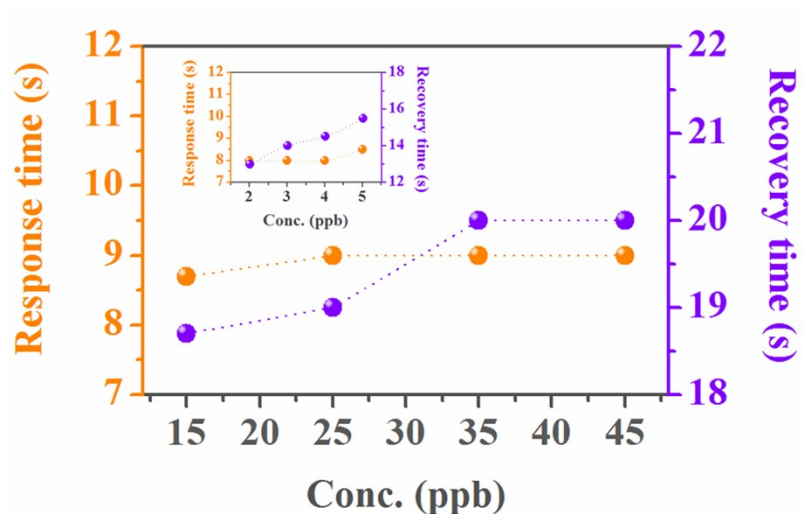

**Fig.S1** Response/recovery times of each concentration stages.

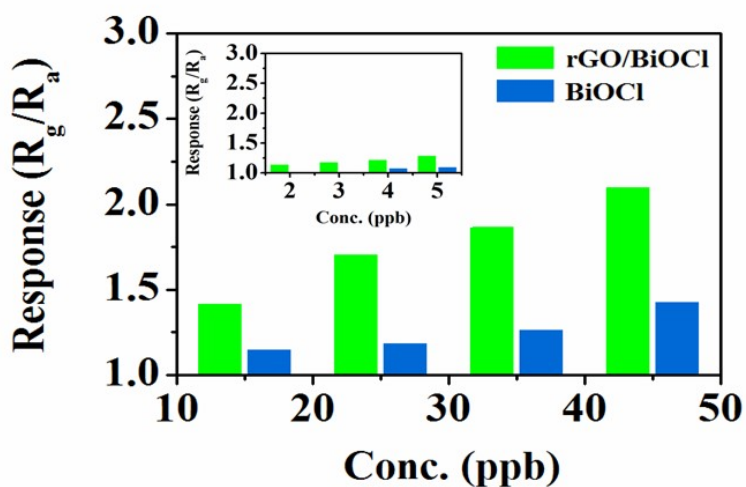

**Fig.S2** Effect of  $\text{NO}_2$  concentration on response of BiOCl and rGO/BiOCl based fabricated sensor.
